# Supplementary material for: Synthesis of β-diketiminate-ligated bimetallic and monometallic lanthanide amide complexes and their reactivity with isoprene and AlMe3
Source: Royal Society of Chemistry journal article supplement (doi:10.1039/c3dt52014e), 2013-01-01
Supplement: c3dt52014e.pdf [file c3dt52014e.pdf]

## Supporting Information

### Synthesis of $\beta$ -diketiminato-ligated bimetallic and monometallic lanthanide amide complexes and their reactivity with isoprene and $\text{AlMe}_3$

Song Sun,<sup>a</sup> Hao Ouyang,<sup>a</sup> Yunjie Luo,<sup>\*,b</sup> Yong Zhang,<sup>a</sup> Qi Shen,<sup>a</sup> and  
Yingming Yao<sup>\*,a</sup>

<sup>a</sup> Key Laboratory of Organic Synthesis of Jiangsu Province, College of Chemistry, Chemical Engineering and Materials Science, Dushu Lake Campus, Soochow University, Suzhou 215123, People's Republic of China

<sup>b</sup> Organometallic Chemistry Laboratory, Ningbo Institute of Technology, Zhejiang University, Ningbo 315100, P. R. China

\* To whom correspondence should be addressed.

E-mail: [yaoym@suda.edu.cn](mailto:yaoym@suda.edu.cn); [lyj@nit.zju.edu.cn](mailto:lyj@nit.zju.edu.cn)

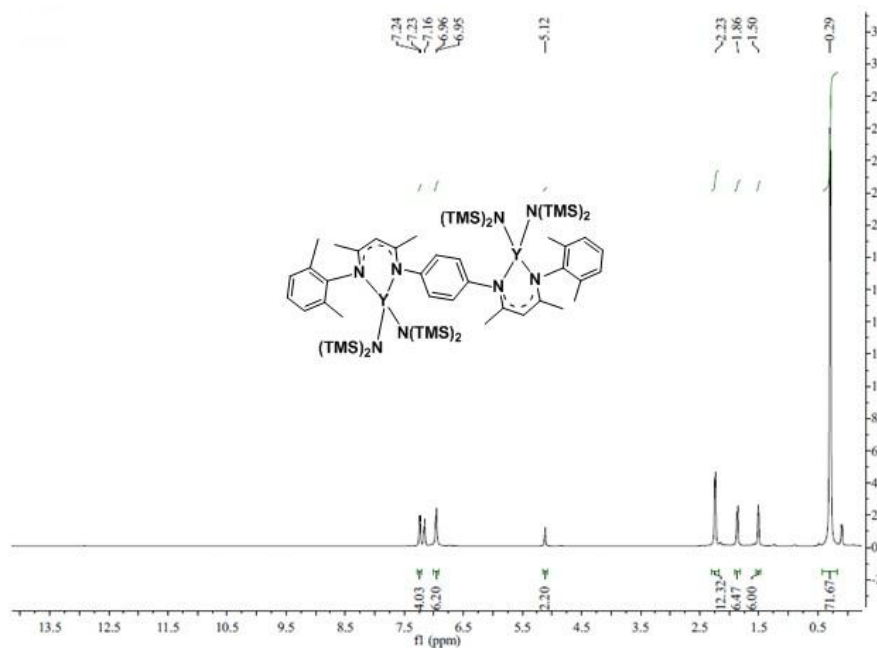

**Figure S1.** <sup>1</sup>H NMR spectrum of complex **1** (400 MHz, C<sub>6</sub>D<sub>6</sub>)

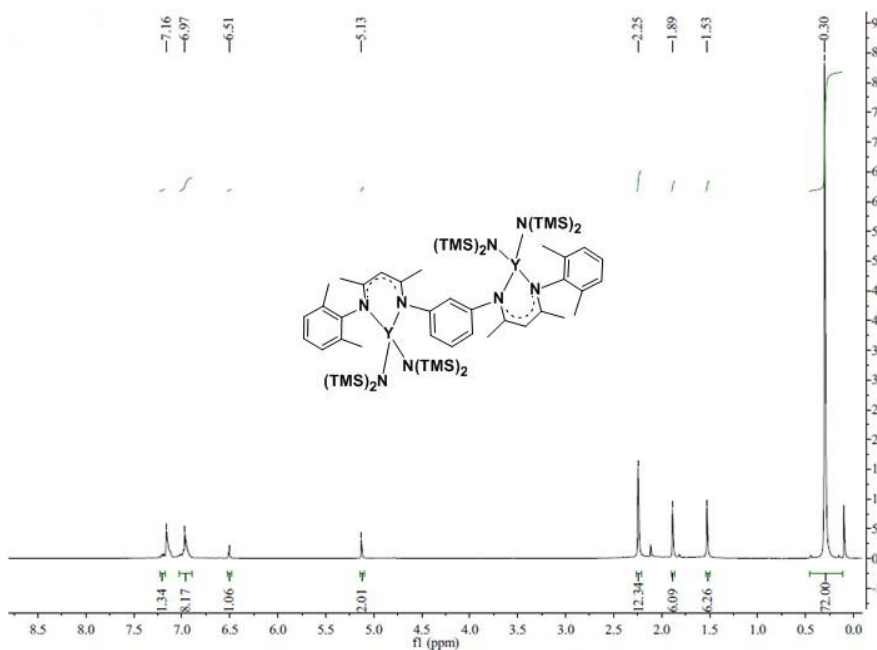

**Figure S2.** <sup>1</sup>H NMR spectrum of complex **3** (400 MHz, C<sub>6</sub>D<sub>6</sub>)

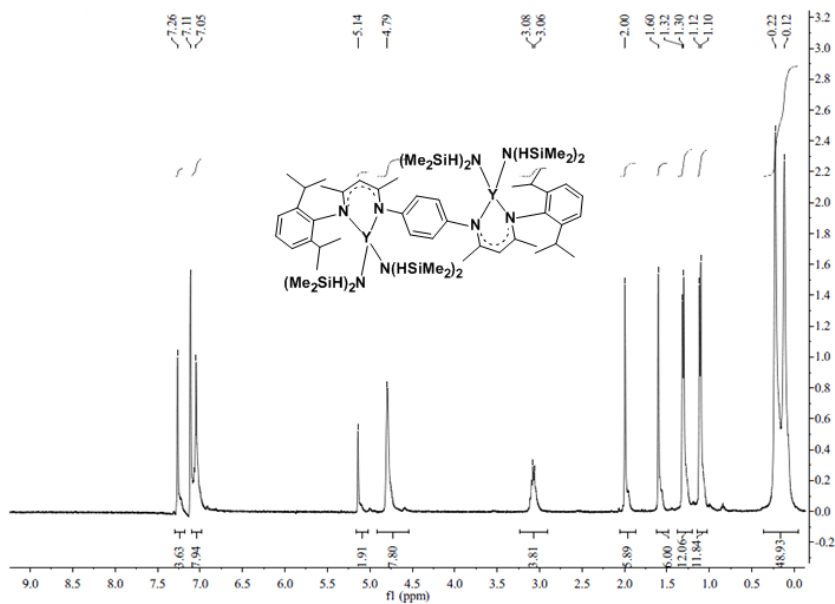

Figure S3.  $^1\text{H}$  NMR spectrum of complex **4** (400 MHz  $\text{C}_6\text{D}_6$ )

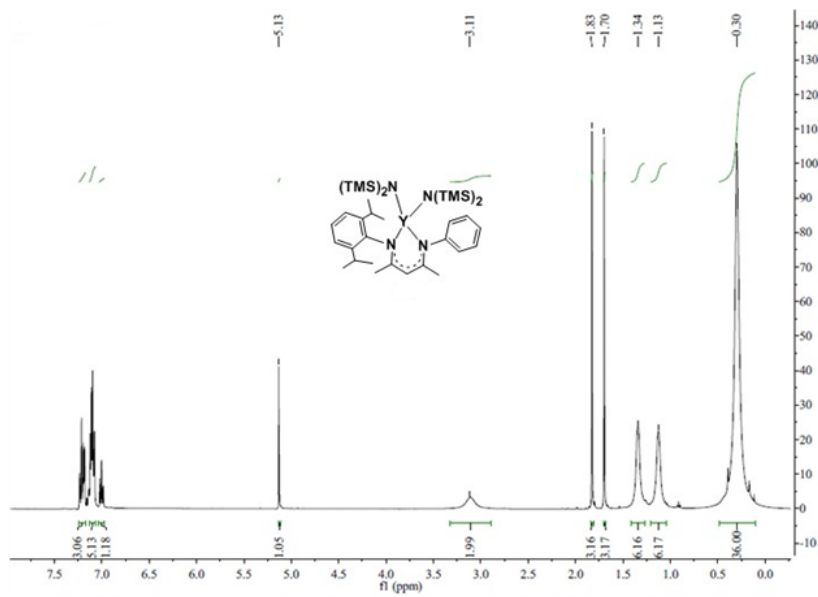

Figure S4.  $^1\text{H}$  NMR spectrum of complex **6** (400 MHz  $\text{C}_6\text{D}_6$ )

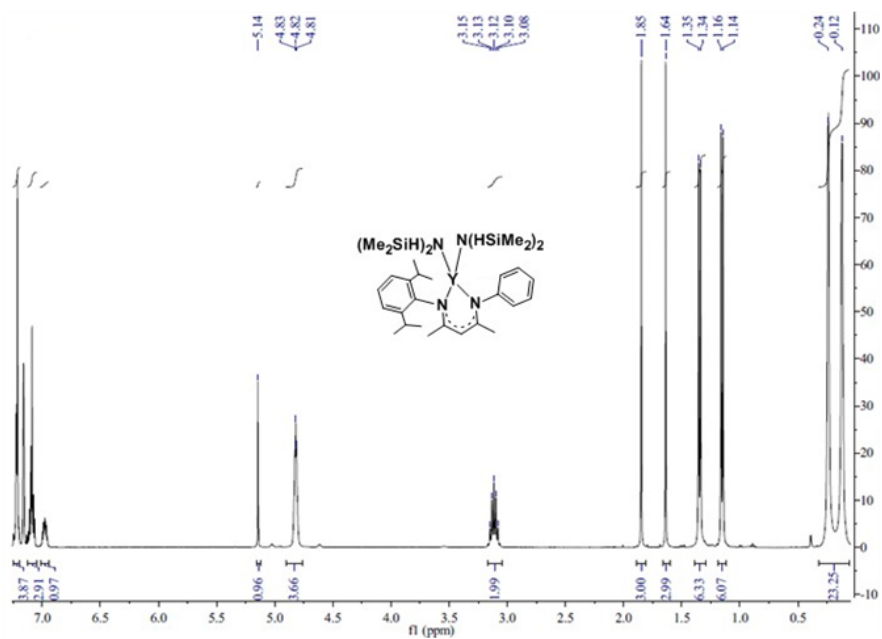

Figure S5.  $^1\text{H}$  NMR spectrum of complex **7** (400 MHz,  $\text{C}_6\text{D}_6$ )

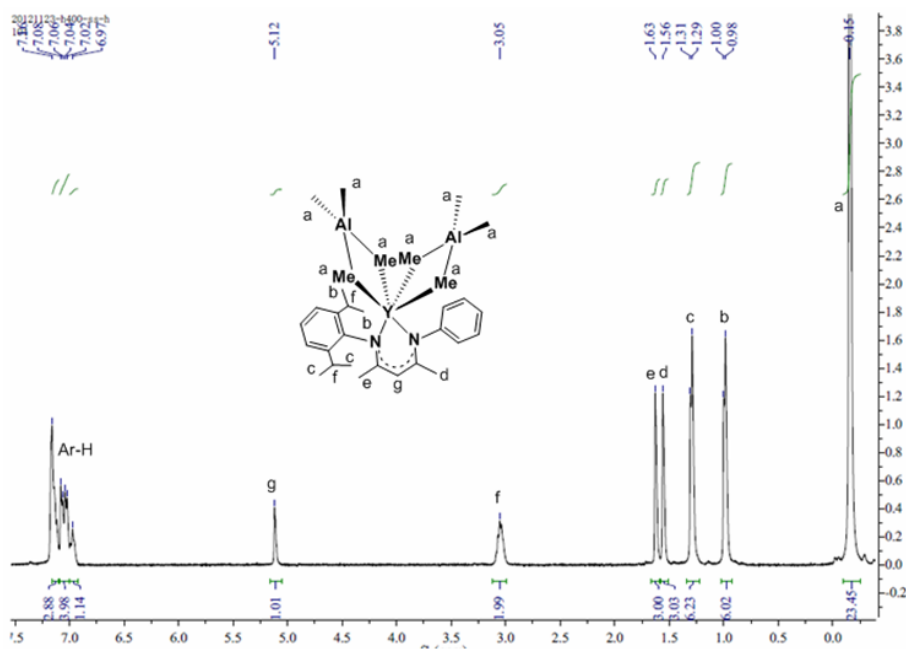

Figure S6.  $^1\text{H}$  NMR spectrum of complex **8** (400 MHz,  $\text{C}_6\text{D}_6$ )

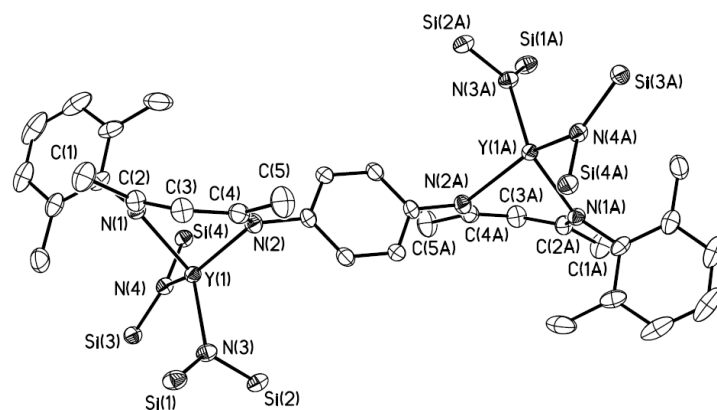

**Figure S7.** ORTEP diagram of complex **1** showing an atom numbering scheme. Thermal ellipsoids are drawn at the 30% probability level, and hydrogen atoms are omitted for clarity.

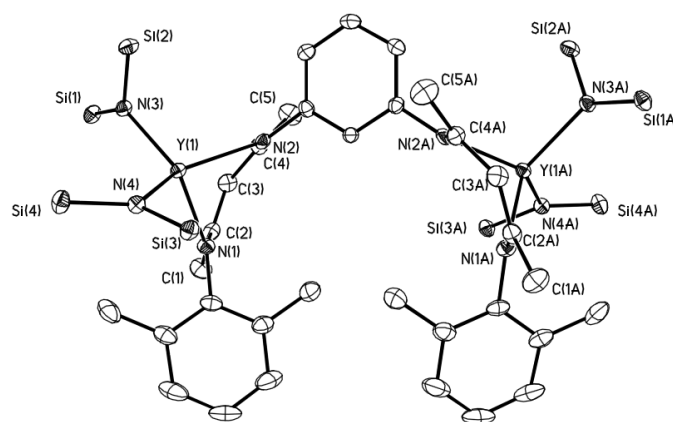

**Figure S8.** ORTEP diagram of complex **3** showing an atom numbering scheme. Thermal ellipsoids are drawn at the 30% probability level, and hydrogen atoms are omitted for clarity.

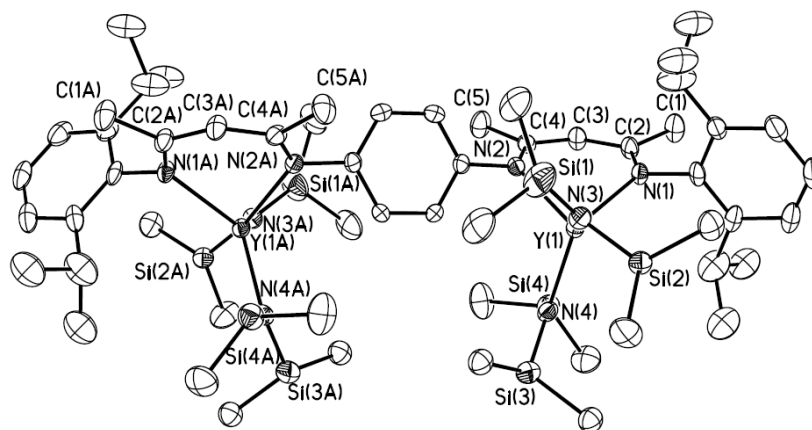

**Figure S9.** ORTEP diagram of complex **4** showing an atom numbering scheme. Thermal ellipsoids are drawn at the 30% probability level, and hydrogen atoms are omitted for clarity.

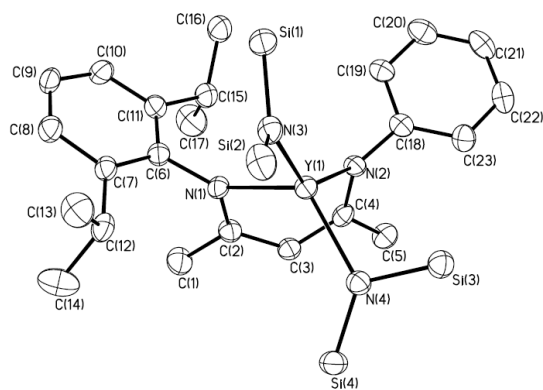

**Figure S10.** ORTEP diagram of complex **6** showing an atom numbering scheme. Thermal ellipsoids are drawn at the 30% probability level, and hydrogen atoms are omitted for clarity.

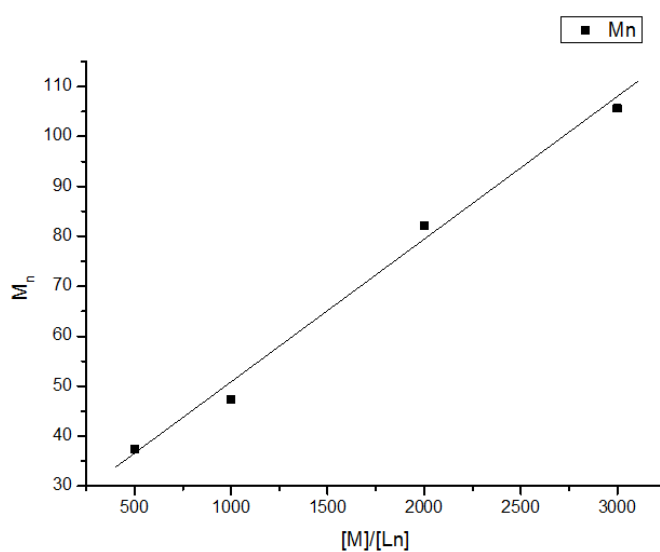

**Figure S11.** Polymerization of isoprene with complex **4** under activation of organic broate and trialkylaluminium. Relationship between the number-averaged molecular weight ( $M_n$ ) and the molar ratio of monomer to initiator.

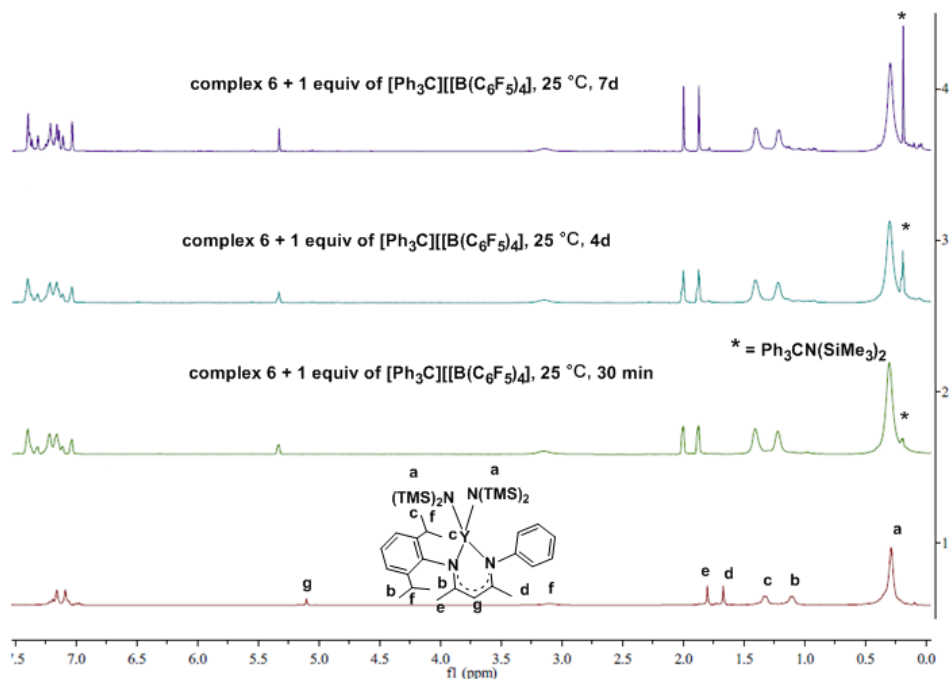

**Figure S12.** Combined  $^1\text{H}$  NMR spectrum of the reaction of complex **6** + 1 equiv of  $[\text{Ph}_3\text{C}][\text{B}(\text{C}_6\text{F}_5)_4]$ , 25 °C, after 30 min, (2), 4 days (3), 7 days (4). (400 MHz,  $\text{C}_6\text{D}_5\text{Cl}+\text{C}_6\text{D}_6$ )

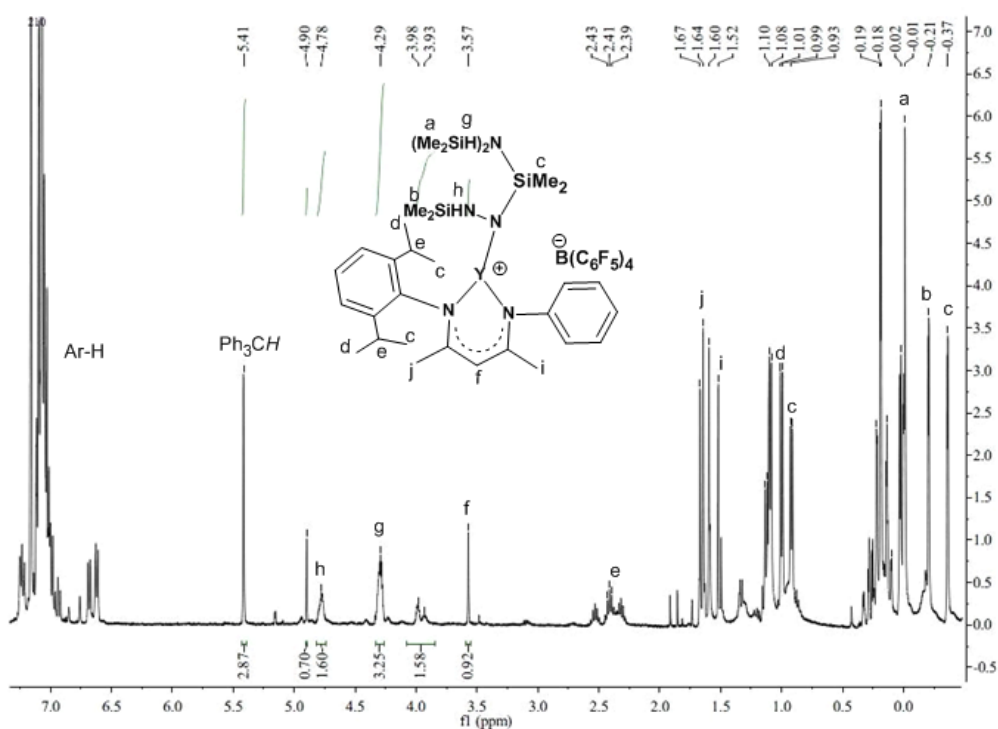

**Figure S13.**  $^1\text{H}$  NMR spectrum of the reaction of complex **7** + 1 equiv of  $[\text{Ph}_3\text{C}][\text{B}(\text{C}_6\text{F}_5)_4]$ , 25 °C, after 30 min. (400 MHz,  $\text{C}_6\text{D}_5\text{Cl}+\text{C}_6\text{D}_6$ )
